# Supplementary material for: Abundance of Ixodes ricinus Ticks (Acari: Ixodidae) and the Diversity of Borrelia Species in Northeastern Poland
Source: MDPI journal article supplement (doi:10.3390/ijerph19127378), 2022-06-16
Supplement: s1 [file s1]

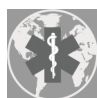

Table S1. Characteristics of *I. ricinus* tick collection localities in north-eastern Poland.

| Region  | Province | Locality    | Geographical coordinates  | Habitats                     |
|---------|----------|-------------|---------------------------|------------------------------|
| West    | Łąwa     | Szałkowo    | 53°39'52.0"N 19°37'03.8"E | Ecotone (grassy path/forest) |
|         |          | Sąpy        | 53°42'30.9"N 19°40'52.8"E | Ecotone (grassy path/forest) |
|         |          | Wielowieś   | 53°46'39.5"N 19°44'58"E   | Forest landscape             |
|         | Ostróda  | Zawady Małe | 53°41'39.2"N 20°05'25.1"E | Forest landscape             |
|         |          | Samborowo   | 53°40'22.3"N 19°47'47.7"E | Ecotone (grassy path/forest) |
| Central | Olsztyn  | Kudypy      | 53°45'58.9"N 20°22'47.4"E | Ecotone (grassy path/forest) |
|         |          | Zazdrość    | 53°41'45.6"N 20°31'21.3"E | Forest landscape             |
|         | Szczytno | Czarny Piec | 53°32'35.6"N 20°37'38.8"E | Ecotone (grassy path/forest) |
|         |          | Warchały    | 53°32'15.6"N 20°49'14.6"E | Forest landscape             |
|         |          | Leleszki    | 53°37'02.6"N 20°43'17.3"E | Ecotone (grassy path/forest) |
| East    | Mrągowo  | Wierzbowo   | 53°48'24.0"N 21°19'25.6"E | Ecotone (grassy path/forest) |
|         |          | Piecki      | 53°48'01.7"N 21°19'33.1"E | Forest landscape             |
|         |          | Sorkwity    | 53°50'19.0"N 21°06'22.6"E | Forest landscape             |
|         | Pisz     | Krutyn      | 53°42'09.0"N 21°26'21.4"E | Forest landscape             |
|         |          | Wygryny     | 53°40'15.8"N 21°32'17.1"E | Ecotone (grassy path/forest) |

Table S2. Statistical table of ANOVA (GLM) analysis of *I. ricinus* tick density in north-eastern Poland.

| Population                       | General Linear Model (GLM) | Effects and effect interactions statistics                                  |
|----------------------------------|----------------------------|-----------------------------------------------------------------------------|
| Total (females + males + nymphs) | Year × Region × Habitat    | Main effect of Year: $F_{1, 89} = 3.6, p = 0.061$                           |
|                                  |                            | Main effect of Region: $F_{2, 89} = 1.3, p = 0.281$                         |
|                                  |                            | Main effect of Habitat: $F_{1, 89} = 0.5, p = 0.484$                        |
|                                  |                            | Effect interaction of Year × Habitat: $F_{1, 89} = 0.0, p = 0.958$          |
|                                  |                            | Effect interaction of Year × Region: $F_{2, 89} = 3.5, p = 0.036^*$         |
| Nymphs                           | Year × Region × Habitat    | Effect interaction of Habitat × Region: $F_{2, 89} = 0.1, p = 0.862$        |
|                                  |                            | Effect interaction of Year × Region × Habitat: $F_{2, 89} = 0.4, p = 0.695$ |
|                                  |                            | Main effect of Year: $F_{1, 89} = 11.7, p = 0.001^*$                        |
|                                  |                            | Main effect of Region: $F_{2, 89} = 5.7, p = 0.005^*$                       |
|                                  |                            | Main effect of Habitat: $F_{1, 89} = 0.4, p = 0.529$                        |
| Nymphs                           | Year × Region × Habitat    | Effect interaction of Year × Habitat: $F_{1, 89} = 0.1, p = 0.762$          |
|                                  |                            | Effect interaction of Year × Region: $F_{2, 89} = 2.8, p = 0.068$           |

|         |                         |                                                                                |
|---------|-------------------------|--------------------------------------------------------------------------------|
| Females | Year × Region × Habitat | Effect interaction of Habitat × Region : $F_{2,89} = 0.3$ ,<br>$p=0.752$       |
|         |                         | Effect interaction of Year × Region × Habitat: $F_{2,89} = 0.8$ ,<br>$p=0.452$ |
| Males   | Year × Region × Habitat | Main effect of Year: $F_{1,89} = 2.0$ , $p = 0.159$                            |
|         |                         | Main effect of Region: $F_{2,89} = 3.8$ , $p = 0.027^*$                        |
|         |                         | Main effect of Habitat: $F_{1,89} = 0.0$ , $p = 0.955$                         |
|         |                         | Effect interaction of Year × Habitat: $F_{1,89} = 0.1$ , $p = 0.707$           |
|         |                         | Effect interaction of Year × Region: $F_{2,89} = 0.4$ , $p = 0.605$            |
|         |                         | Effect interaction of Habitat × Region : $F_{2,89} = 0.2$ ,<br>$p=0.784$       |
|         |                         | Effect interaction of Year × Region × Habitat: $F_{2,89} = 0.0$ ,<br>$p=0.981$ |
|         |                         | Main effect of Year: $F_{1,89} = 6.0$ , $p = 0.016^*$                          |
|         |                         | Main effect of Region: $F_{2,89} = 2.5$ , $p = 0.092$                          |
|         |                         | Main effect of Habitat: $F_{1,89} = 0.2$ , $p = 0.647$                         |
|         |                         | Effect interaction of Year × Habitat: $F_{1,89} = 0.1$ , $p = 0.709$           |
|         |                         | Effect interaction of Year × Region: $F_{2,89} = 0.4$ , $p = 0.656$            |
|         |                         | Effect interaction of Habitat × Region : $F_{2,89} = 2.8$ ,<br>$p=0.066$       |
|         |                         | Effect interaction of Year × Region × Habitat: $F_{2,89} = 0.5$ ,<br>$p=0.586$ |

\* statistically significant -  $p<0.05$ .

**Table S3.** Variants of *flaB* gene in spirochaetes species from *B. burgdorferi* s.l complex identified in questing *I. ricinus* in north-eastern Poland.

| Species               | Variant | Isolate (n) | Accession number in GenBank | Similarity in GenBank     |              |                       |                |
|-----------------------|---------|-------------|-----------------------------|---------------------------|--------------|-----------------------|----------------|
|                       |         |             |                             | Reference in GenBank      | Identity (%) | Host                  | Country        |
| <i>B. bavariensis</i> | BbavV1  | 1           | MW963152                    | CP028872 (strain Pbi)     | 100          | human                 | Germany        |
|                       |         |             |                             | MN958342                  |              | <i>I. ricinus</i>     | Iran           |
| <i>B. burgdorferi</i> | BbV1    | 5           | MW963153                    | MF150052                  | 100          | <i>I. ricinus</i>     | Poland         |
|                       |         |             |                             | CP001205 (strain ZS7)     |              | tick                  | Germany        |
|                       |         |             |                             | FJ231335                  |              | human                 | Czech Republic |
| <i>B. valaisiana</i>  | BvV1    | 5           | MW963154                    | MF150077                  | 100          | <i>I. ricinus</i>     | Poland         |
|                       |         |             |                             | MT813126                  |              | <i>I. persulcatus</i> | Lithuania      |
| <i>B. lusitaniae</i>  | BIV1    | 12          | MW963155                    | CP009117 (strain Tom4006) | 100          |                       | Siberia        |
|                       |         |             |                             | MF150075                  |              | <i>I. ricinus</i>     | central Poland |

|                   |      |   |              |                      |      |                                                           |                  |
|-------------------|------|---|--------------|----------------------|------|-----------------------------------------------------------|------------------|
| <i>B. garinii</i> | BIV2 | 5 | MW96315<br>6 | KF422804             | 99.8 | <i>I. ricinus</i>                                         | western Poland   |
|                   |      |   |              | MW272741             |      |                                                           | Romania          |
|                   |      |   |              | MF150075             |      |                                                           | central Poland   |
|                   |      |   |              | KF422804             |      |                                                           | western Poland   |
|                   | BIV3 | 5 | MW96315<br>7 | MW272741             | 100  | <i>I. ricinus</i><br><i>Apodemus agrarius</i> (spleen)    | Romania          |
|                   |      |   |              | KR782242             |      |                                                           | Poland           |
|                   |      |   |              | AB091809             |      |                                                           | Turkey           |
|                   |      |   |              | KF894062             |      |                                                           | Poland           |
|                   | BIV4 | 1 | MW96315<br>8 | MF150075             | 99.6 | <i>I. ricinus</i>                                         | central Poland   |
|                   |      |   |              | KF422804             |      |                                                           | western Poland   |
|                   |      |   |              | MW272741             |      |                                                           | Romania          |
|                   |      |   |              | MK604254             |      |                                                           | Poland           |
|                   | BgV1 | 6 | MW96315<br>9 | KF990320             | 100  | <i>I. ricinus</i>                                         | S-W Poland       |
|                   |      |   |              | JN828685             |      |                                                           | Czech Republic   |
|                   |      |   |              | KF918606             | 100  | <i>I. ricinus</i> fed on <i>Vulpes vulpes</i>             | Poland           |
|                   |      |   |              | MK604257<br>KF836510 |      | <i>I. ricinus</i>                                         | S-W Poland       |
|                   | BgV3 | 5 | MW96316<br>1 | KF422775             | 100  | <i>I. ricinus</i> fed on <i>Nyctereutes procyonoides</i>  | Poland           |
|                   |      |   |              | KF836512             |      | <i>I. ricinus</i>                                         | S-W Poland       |
|                   |      |   |              | HM345905             |      |                                                           | western Poland   |
|                   |      |   |              | MK604255             | 99.6 | <i>I. ricinus</i>                                         | Poland           |
|                   | BgV4 | 4 | MW96316<br>2 | KF990320             |      |                                                           | S-W Poland       |
|                   |      |   |              | JN828685             |      |                                                           | Czech Republic   |
|                   |      |   |              | MK604261             | 100  | <i>I. ricinus</i><br><i>Apodemus flavicollis</i> (spleen) | Poland           |
|                   | BgV5 | 3 | MW96316<br>3 | KF894053             |      | <i>I. ricinus</i> fed on <i>Dama dama</i>                 |                  |
|                   |      |   |              | KF422816             |      |                                                           |                  |
|                   | BgV6 | 3 | MW96316<br>4 | MK604253<br>AB091814 | 100  | <i>I. ricinus</i>                                         | Poland<br>Turkey |

|                   |       |              |                           |                             |                   |                                                                 |                   |
|-------------------|-------|--------------|---------------------------|-----------------------------|-------------------|-----------------------------------------------------------------|-------------------|
| <i>B. afzelii</i> | BgV7  | 3            | MW96316<br>5              | KJ577820                    | 100               | <i>I. ricinus</i> fed<br>on <i>Myotis</i><br><i>daubentonii</i> | Poland            |
|                   |       |              |                           | KF422783                    |                   | <i>I. ricinus</i>                                               | Poland            |
|                   |       |              |                           | KF894058                    |                   | <i>Apodemus</i><br><i>flavicollis</i><br>(spleen)               |                   |
|                   |       |              |                           | HM345902                    |                   | <i>I. ricinus</i> fed<br>on <i>Turdus</i><br><i>philomelos</i>  |                   |
|                   | BgV8  | 4            | MW96316<br>6              | KX646198                    | 100               | <i>I. ricinus</i>                                               | Poland            |
|                   |       |              |                           | DQ650336                    |                   | <i>Apodemus</i>                                                 |                   |
|                   |       |              |                           | KF894055                    |                   | <i>agrarius</i><br>(spleen)                                     |                   |
|                   | BgV9  | 2            | MW96316<br>7              | MK604263                    | 100               | <i>I. ricinus</i>                                               | Poland            |
|                   |       |              |                           | KF990322                    |                   |                                                                 | western<br>Poland |
|                   |       |              |                           | MN958341                    |                   |                                                                 | Iran              |
|                   | BgV10 | 1            | MW96316<br>8              | MK604255                    | 99.8              | <i>I. ricinus</i>                                               | Poland            |
|                   |       |              |                           | KF990320                    |                   |                                                                 | S-W Poland        |
|                   |       |              |                           | JN828685                    |                   |                                                                 | Czech<br>Republic |
|                   | BgV11 | 1            | MW96316<br>9              | CP028861<br>(strain 200047) | 100               | <i>I. ricinus</i> fed<br>on bird                                | France            |
|                   |       |              |                           | KR782222                    |                   | <i>I. ricinus</i>                                               | Poland            |
|                   |       |              |                           | KF894061                    |                   | <i>Apodemus</i><br><i>agrarius</i><br>(spleen)                  | Poland            |
| BaV1              | 38    | MW96317<br>1 | CP018262<br>(strain BO23) | 100                         | human skin        | Germany                                                         |                   |
|                   |       |              | CP009058<br>(strain K78)  |                             |                   | Austria                                                         |                   |
|                   |       |              | MK604271                  |                             | <i>I. ricinus</i> | Poland                                                          |                   |
|                   |       |              | KR782215                  |                             |                   | N-W Poland                                                      |                   |
| BaV2              | 2     | MW96317<br>2 | KF422856                  | 100                         | <i>I. ricinus</i> | Poland                                                          |                   |
|                   |       |              | JN828691                  |                             |                   | Czech<br>Republic                                               |                   |
